# Supplementary material
Source: publisher figshare collection journal article supplement (https://frontiersin.figshare.com/ndownloader/files/22383684)
Supplement: Supplementary file [file 22383684]

**TABLE S3** Antimicrobial susceptibility testing of 21 antimicrobial agents from 14 classes in this study

| Antimicrobial class<br>Agent                 | Number (%) of antimicrobial resistant (R), intermediate resistant (I), and susceptible (S) isolates |           |           |            |           |           |              |          |          |              |           |           |
|----------------------------------------------|-----------------------------------------------------------------------------------------------------|-----------|-----------|------------|-----------|-----------|--------------|----------|----------|--------------|-----------|-----------|
|                                              | Chicken (n=32)                                                                                      |           |           | Pig (n=41) |           |           | Cattle (n=4) |          |          | Total (n=77) |           |           |
|                                              | R                                                                                                   | I         | S         | R          | I         | S         | R            | I        | S        | R            | I         | S         |
| Aminoglycoside                               |                                                                                                     |           |           |            |           |           |              |          |          |              |           |           |
| Gentamicin                                   | 15 (46.9)                                                                                           | 3 (9.4)   | 14 (43.8) | 20 (48.8)  | 0         | 21 (51.2) | 0            | 0        | 4 (100)  | 35 (45.5)    | 3 (3.9)   | 39 (50.6) |
| Amikacin                                     | 0                                                                                                   | 0         | 32 (100)  | 1 (2.4)    | 0         | 40 (97.6) | 0            | 0        | 4 (100)  | 1 (1.3)      | 0         | 76 (98.7) |
| Carbapenem                                   |                                                                                                     |           |           |            |           |           |              |          |          |              |           |           |
| Ertapenem                                    | 0                                                                                                   | 0         | 32 (100)  | 0          | 0         | 41 (100)  | 0            | 0        | 4 (100)  | 0            | 0         | 77 (100)  |
| Imipenem                                     | 0                                                                                                   | 0         | 32 (100)  | 0          | 1 (2.4)   | 40 (97.6) | 0            | 0        | 4 (100)  | 0            | 1 (1.3)   | 76 (98.7) |
| Meropenem                                    | 0                                                                                                   | 0         | 32 (100)  | 0          | 0         | 41 (100)  | 0            | 0        | 4 (100)  | 0            | 0         | 77 (100)  |
| Non-extended-spectrum cephalosporin          |                                                                                                     |           |           |            |           |           |              |          |          |              |           |           |
| Cefazolin                                    | 32 (100)                                                                                            | 0         | 0         | 41 (100)   | 0         | 0         | 4 (100)      | 0        | 0        | 77 (100)     | 0         | 0         |
| Extended-spectrum cephalosporin              |                                                                                                     |           |           |            |           |           |              |          |          |              |           |           |
| Cefotaxime                                   | 32 (100)                                                                                            | 0         | 0         | 41 (100)   | 0         | 0         | 4 (100)      | 0        | 0        | 77 (100)     | 0         | 0         |
| Ceftazidime                                  | 0                                                                                                   | 4 (12.5)  | 28 (87.5) | 3 (7.3)    | 19 (46.3) | 19 (46.3) | 0            | 2 (50.0) | 2 (50.0) | 3 (3.9)      | 25 (32.5) | 49 (63.6) |
| Cefepime                                     | 4 (12.5)                                                                                            | 25 (78.1) | 3 (9.4)   | 11 (26.8)  | 26 (63.4) | 4 (9.8)   | 1 (25.0)     | 3 (75.0) | 0        | 16 (20.8)    | 54 (70.1) | 7 (9.1)   |
| Cephamycin                                   |                                                                                                     |           |           |            |           |           |              |          |          |              |           |           |
| Cefoxitin                                    | 0                                                                                                   | 0         | 32 (100)  | 0          | 0         | 41 (100)  | 0            | 0        | 4 (100)  | 0            | 0         | 77 (100)  |
| Fluoroquinolone                              |                                                                                                     |           |           |            |           |           |              |          |          |              |           |           |
| Ciprofloxacin                                | 24 (75.0)                                                                                           | 2 (6.3)   | 6 (18.8)  | 12 (29.3)  | 3 (7.3)   | 26 (63.4) | 0            | 0        | 4 (100)  | 36 (46.8)    | 5 (6.5)   | 36 (46.8) |
| Quinolone                                    |                                                                                                     |           |           |            |           |           |              |          |          |              |           |           |
| Nalidixic acid                               | 32 (100)                                                                                            | 0         | 0         | 21 (51.2)  | 4 (9.8)   | 16 (39.0) | 0            | 0        | 4 (100)  | 53 (68.8)    | 4 (5.2)   | 20 (26.0) |
| Folate pathway inhibitor                     |                                                                                                     |           |           |            |           |           |              |          |          |              |           |           |
| Trimethoprim-sulfamethoxazole                | 16 (50.0)                                                                                           | 0         | 16 (50.0) | 29 (70.7)  | 1 (2.4)   | 11 (26.8) | 0            | 0        | 4 (100)  | 45 (58.4)    | 1 (1.3)   | 31 (40.3) |
| Glycylcycline                                |                                                                                                     |           |           |            |           |           |              |          |          |              |           |           |
| Tigecycline                                  | 0                                                                                                   | 0         | 32 (100)  | 0          | 0         | 41 (100)  | 0            | 0        | 4 (100)  | 0            | 0         | 77 (100)  |
| Monobactam                                   |                                                                                                     |           |           |            |           |           |              |          |          |              |           |           |
| Aztreonam                                    | 10 (31.3)                                                                                           | 6 (18.8)  | 16 (50.0) | 27 (65.9)  | 5 (12.2)  | 9 (22.0)  | 3 (75.0)     | 1 (25.0) | 0        | 40 (51.9)    | 12 (15.6) | 25 (32.5) |
| Penicillin                                   |                                                                                                     |           |           |            |           |           |              |          |          |              |           |           |
| Ampicillin                                   | 32 (100)                                                                                            | 0         | 0         | 41 (100)   | 0         | 0         | 4 (100)      | 0        | 0        | 77 (100)     | 0         | 0         |
| Piperacillin                                 | 32 (100)                                                                                            | 0         | 0         | 40 (97.6)  | 1 (2.4)   | 0         | 4 (100)      | 0        | 0        | 76 (98.7)    | 1 (1.3)   | 0         |
| Penicillin plus $\beta$ -lactamase inhibitor |                                                                                                     |           |           |            |           |           |              |          |          |              |           |           |
| Amoxicillin-clavulanic acid                  | 0                                                                                                   | 3 (9.4)   | 29 (90.6) | 1 (2.4)    | 13 (31.7) | 27 (65.9) | 0            | 0        | 4 (100)  | 1 (1.3)      | 16 (20.8) | 60 (77.9) |
| Ampicillin-sulbactam                         | 1 (3.1)                                                                                             | 9 (28.1)  | 22 (68.8) | 1 (2.4)    | 17 (41.5) | 23 (56.1) | 0            | 0        | 4 (100)  | 2 (2.6)      | 26 (33.8) | 49 (63.6) |
| Phenicol                                     |                                                                                                     |           |           |            |           |           |              |          |          |              |           |           |
| Chloramphenicol                              | 23 (71.9)                                                                                           | 0         | 9 (28.1)  | 32 (78.0)  | 1 (2.4)   | 8 (19.5)  | 0            | 0        | 4 (100)  | 55 (71.4)    | 1 (1.3)   | 21 (27.3) |
| Tetracycline                                 |                                                                                                     |           |           |            |           |           |              |          |          |              |           |           |
| Tetracycline                                 | 20 (62.5)                                                                                           | 1 (3.1)   | 11 (34.4) | 32 (78.0)  | 0         | 9 (22.0)  | 0            | 0        | 4 (100)  | 52 (67.5)    | 1 (1.3)   | 24 (31.2) |
